# Supplementary material
Source: PubMed Central journal article supplement (PMC543482)

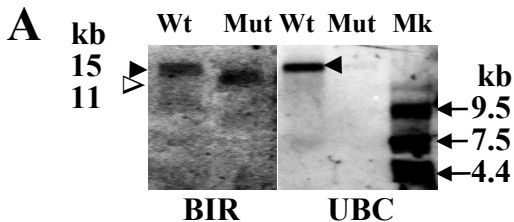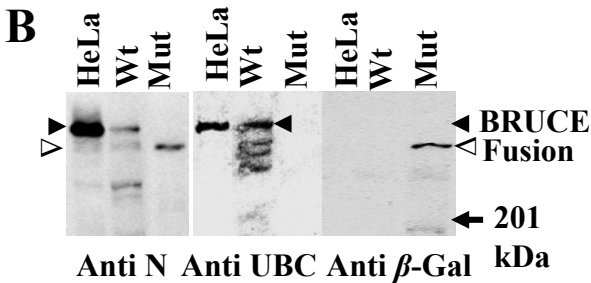

Supplement: pnas_102_3_565__1.pdf [file pnas_102_3_565__1.pdf]

**A**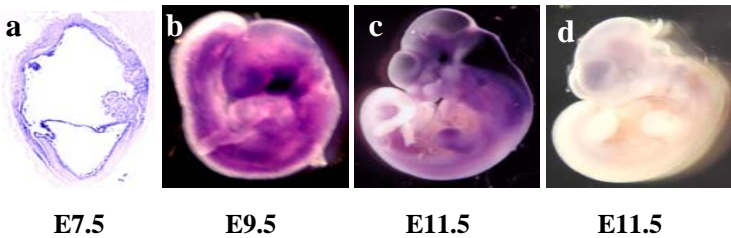**B**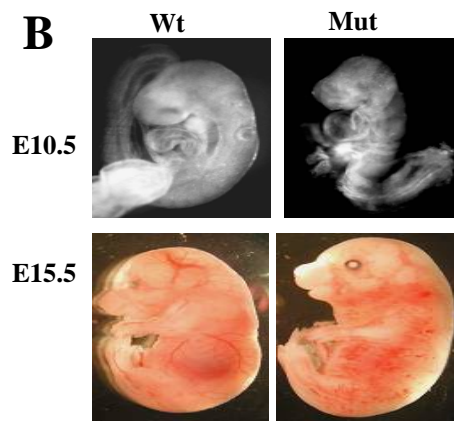**C**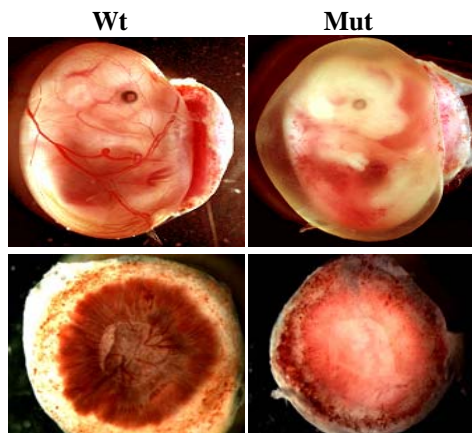**D**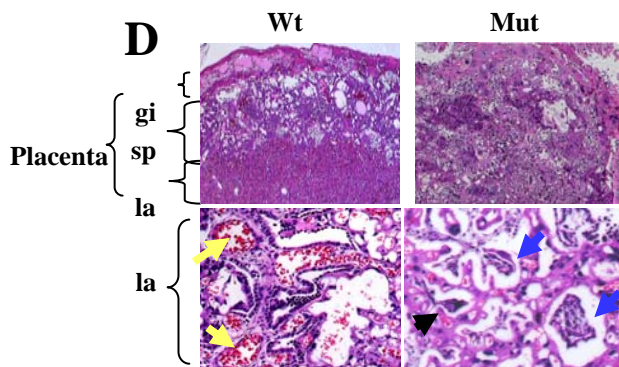**E**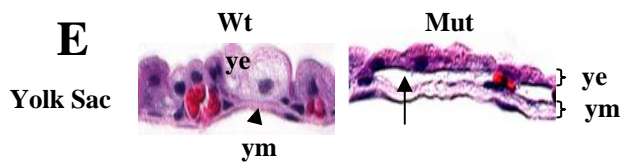

Supplement: pnas_102_3_565__2.pdf [file pnas_102_3_565__2.pdf]
